# Supplementary material for: Role of Two Metacaspases in Development and Pathogenicity of the Rice Blast Fungus Magnaporthe oryzae
Source: PubMed Central journal article supplement (PMC7885106; doi:10.1128/mbio.03471-20), 2021-02-09
Supplement: mBio.03471-20-st001.pdf [file mBio.03471-20-st001.pdf]

1 **Table S1.** *Magnaporthe oryzae* strains used in this study.

| Strain                         | Genotype                                                                                                                   | Reference      |
|--------------------------------|----------------------------------------------------------------------------------------------------------------------------|----------------|
| KV1                            | O-137 with cytoplasmic eGFP                                                                                                | (24)           |
| $\Delta$ Momca1                | MGG_04926 deletion mutant of KV1                                                                                           | This study     |
| $\Delta$ Momca2                | MGG_13530 deletion mutant of KV1                                                                                           | This study     |
| $\Delta$ Momca1mca2            | MGG_04926 and MGG_13530 deletion mutant of KV1                                                                             | This study     |
| $\Delta$ Momca1mca2-C          | Complementation strain with pBGt carrying the full-length <i>MoMCA1</i> and <i>MoMCA2</i> genes and their native promoters | This study     |
| <i>E. coli</i> (DH5 $\alpha$ ) | pGB1805-yca1 ORF (YOR197W)                                                                                                 | Dharmacon, Inc |
| yca1 $\Delta$                  | MATa yca1::KanR his3 $\Delta$ 0 leu2 $\Delta$ 0 met15 $\Delta$ 0 ura3 $\Delta$ 0                                           | Dharmacon, Inc |
| BY4741                         | MATa his3 $\Delta$ 0 leu2 $\Delta$ 0 met15 $\Delta$ 0 ura3 $\Delta$ 0                                                      | (33)           |
| yca1 $\Delta$ ::Yca1           | MATa yca1::KanR his3 $\Delta$ 0 leu2 $\Delta$ 0 met15 $\Delta$ 0 ura3 $\Delta$ 0<br>pESC-LEU-Yca1                          | This study     |
| yca1 $\Delta$ ::MoMca1         | MATa yca1::KanR his3 $\Delta$ 0 leu2 $\Delta$ 0 met15 $\Delta$ 0 ura3 $\Delta$ 0<br>pESC-LEU-MoMca1                        | This study     |
| yca1 $\Delta$ ::MoMca2         | MATa yca1::KanR his3 $\Delta$ 0 leu2 $\Delta$ 0 met15 $\Delta$ 0 ura3 $\Delta$ 0<br>pESC-LEU-MoMca2                        | This study     |

2

3

4

5

6

7

8

9

10

11

12

13

14

15
