# Supplementary material for: Role of Two Metacaspases in Development and Pathogenicity of the Rice Blast Fungus Magnaporthe oryzae
Source: PubMed Central journal article supplement (PMC7885106; doi:10.1128/mbio.03471-20), 2021-02-09
Supplement: mBio.03471-20-st002.pdf [file mBio.03471-20-st002.pdf]

1 **Table S2.** Oligonucleotide primers used in this study.

| Gene                                      | Primer                                | Sequence 5' – 3'                                              |                        |
|-------------------------------------------|---------------------------------------|---------------------------------------------------------------|------------------------|
| <b>Split marker gene deletion</b>         |                                       |                                                               |                        |
| <i>ILV1</i><br>Sulfonylurea<br>resistance | M13F:IL                               | <b>CGCCAGGGGTTTTCCCAGTCACGAC</b><br>GTCGACGTGCCAACGCCACAG     |                        |
|                                           | ILSplit                               | AAGCATGTGCAGTGCCTTC                                           |                        |
|                                           | M13R:LV1                              | <b>AGCGGATAACAATTTACACAGGAT</b> CGACGTGAGAGCATGCTAA           |                        |
|                                           | LV1Split                              | GAGGCCGACGTCATAGGCATC                                         |                        |
| <i>HPH</i><br>Hygromycin<br>resistance    | M13F:HY                               | <b>CGCCAGGGGTTTTCCCAGTCACGAC</b> CTGATATTGAAGGAGCATT          |                        |
|                                           | HYSplitR                              | GGATGCCTCCGCTCGAAGTA                                          |                        |
|                                           | M13R:YG                               | <b>AGCGGATAACAATTTACACAGGA</b> CTATTCCTTTGCCCTCGGACGA         |                        |
|                                           | YGSplitF                              | CGTTGCAAGACCTGCCTGAA                                          |                        |
| <i>MoMca1</i> ;<br>MGG_04926              | LF-FW                                 | ATAGATGAAGTGATAGTAGCAGGTGAG                                   |                        |
|                                           | LF-REV                                | <b>GTCGTGACTGGGAAAACCCTGGCG</b><br>GTGAAGGTGTGGATATCTCAGATAT  |                        |
|                                           | RF-FW                                 | <b>TCCTGTGTGAAATTGTTATCCGCT</b><br>CTACACTCTACCAACAGACTACGGAT |                        |
|                                           | RF-REV                                | GTCTGATTAGAACATGATTAGTCTCTTG                                  |                        |
|                                           | NesFW                                 | CCTTGTGAGATTATGGTCGAGG                                        |                        |
|                                           | NesREV                                | TTGCATTTTATAGAGAAG                                            |                        |
|                                           |                                       | GCTAAGACACTCGACCCAAGTGC                                       |                        |
| <i>MoMca2</i> ;<br>MGG_13530              | LF-REV                                | <b>GTCGTGACTGGGAAAACCCTGGCG</b><br>CAAGGTGGAAATGTTGCGTATAAG   |                        |
|                                           | RF-FW                                 | <b>TCCTGTGTGAAATTGTTATCCGCT</b><br>CCGCAGCTGAGACCTATATACTCTCT |                        |
|                                           | RF-REV                                | ATAACCACAGTGCTGAGCGTCCG                                       |                        |
|                                           | NesFW                                 | AGGACTAGCGGTGCCGTTTATC                                        |                        |
|                                           | NesREV                                | TCTCAGAATAAGCCGACCCTTTGT                                      |                        |
|                                           | <b>Gene specific primers for qPCR</b> |                                                               |                        |
|                                           | <i>MoMca1</i>                         | <i>qMoMca2-F</i>                                              | CAGGAACCAGACTTACAACCAG |
| <i>qMoMca2-R</i>                          |                                       | CTGAGGTTTCTGGCTGTA CTG                                        |                        |
| <i>MoMca2</i>                             | <i>qMoMca1-F</i>                      | AACAAAAGACCTCGACGGAG                                          |                        |
|                                           | <i>qMoMca1-R</i>                      | ATGTACGGCAAATCTAGGGC                                          |                        |
| <i>MoAct1</i> ;<br>MGG_03982              | <i>qMoAct1-F</i>                      | ACAATGGTTCGGGTATGTGC                                          |                        |
|                                           | <i>qMoAct1-R</i>                      | CGACAATGGACGGGAAGAC                                           |                        |
| <b>Protein expression</b>                 |                                       |                                                               |                        |
| pET15b<br><i>MoMca1</i> Nde1<br>FW        |                                       | GATCCATATGATGAGCGGTTATCCCGGTCA                                |                        |
| pET15b<br><i>MoMca1</i> Xho1<br>REV       |                                       | GATCCTCGAGTTA CATGACAAACCACACGTTTTTCG                         |                        |
| pET15b<br><i>MoMca2</i> Nde1<br>FW        |                                       | GATCCATATGATGTCTGGATACCCGGGTCAG                               |                        |
| pET15b                                    |                                       | GATCCTCGAGTTACAAGATGAACCTTAGATCCG                             |                        |

|                                   |     |                                                                                        |
|-----------------------------------|-----|----------------------------------------------------------------------------------------|
| MoMca2 XhoI<br>REV                |     |                                                                                        |
| pET15b; Yca1<br>NdeI FW           |     | GATCCATATGATGTATCCAGGTAGTGGACGT                                                        |
| pET15b; Yca1<br>XhoI REV          |     | GATCCTCGAGCTACATAATAAATTGCAGATTTACG                                                    |
| <b>Missense mutation</b>          |     |                                                                                        |
| pET15b; Yca1<br>C276A FW          |     | CAGCATTGTTTGACTCTGCTCATTCCGGGTACAGTGT                                                  |
| pET15b; Yca1<br>C276A REV         |     | ACACTGTACCCGAATGAGCAGAGTCAAACAATGCTG                                                   |
| pET15b;<br>MoMca1 C242A<br>FW     |     | GCCATCTTTGACTCTGCTCACTCTGGCACTGC                                                       |
| pET15b;<br>MoMca1 C242A<br>REV    |     | GCAGTGCCAGAGTGAGCAGAGTCAAAGATGGC                                                       |
| pET15b;<br>MoMca2 C257A<br>FW     |     | ATCTTCGACTCCGCCATTCCGGAAC                                                              |
| pET15b;<br>MoMca2 C257A<br>REV    |     | GTTCCCGAATGGGCGGAGTCGAAGAT                                                             |
| <b>Complementation</b>            |     |                                                                                        |
| pBGt<br>MoMca1,<br>MoMca2         | FW  | ACAGCTATGACATGATTACGAATTCGTGGGTAGCTGCAACCTAG                                           |
|                                   | REV | TTACTTATCGTCGTCATCCTTGTAATCCATGACAAACCACACGTTTTTC                                      |
|                                   | FW  | GATTACAAGGATGACGACGATAAGTAATGAGACTGCGGTTCCGGAC                                         |
|                                   | REV | TAAAACGACGGCCAGTGCCAAGCTTTTTAGAGGTCTTCTTCGGAAATCA<br>ACTTCTGTTCCAA GATGAACCTTAGATCCGTG |
| <b>Yeast expression</b>           |     |                                                                                        |
| pESC-Leu<br>MoMca1 XhoI<br>FW     |     | GATCCTCGAGATGAGCGGTTATCCCGGTCAAG                                                       |
| pESC-Leu<br>MoMca1 HindIII<br>REV |     | CCTAAAGCTTTTACATGACAAACCACACGTTTTTCGGTA                                                |
| pESC-Leu<br>MoMca2 XhoI<br>FW     |     | GATCCTCGAGATGTCTGGATACCCGGGTCAGG                                                       |
| pESC-Leu<br>MoMca2 HindIII<br>REV |     | CCTAAAGCTTTTA CAAGATGAACCTTAGATCCGTGTTTCAG                                             |
| pESC-Leu Yca1<br>XhoI FW          |     | GATCCTCGAGATGTATCCAGGTAGTGGACGT                                                        |
| pESC-Leu Yca1<br>HindIII REV      |     | CCTAAAGCTTCTACATAATAAATTGCAGATTTACG                                                    |

2

3
